# Supplementary material for: Shared Patterns of Brain Functional Connectivity for the Comorbidity between Migraine and Insomnia
Source: MDPI journal article supplement (doi:10.3390/biomedicines9101420), 2021-10-09
Supplement: s1 [file biomedicines-1393961-SI.pdf › biomedicines-1393961-SI.pdf]

Supplementary Figure Legends

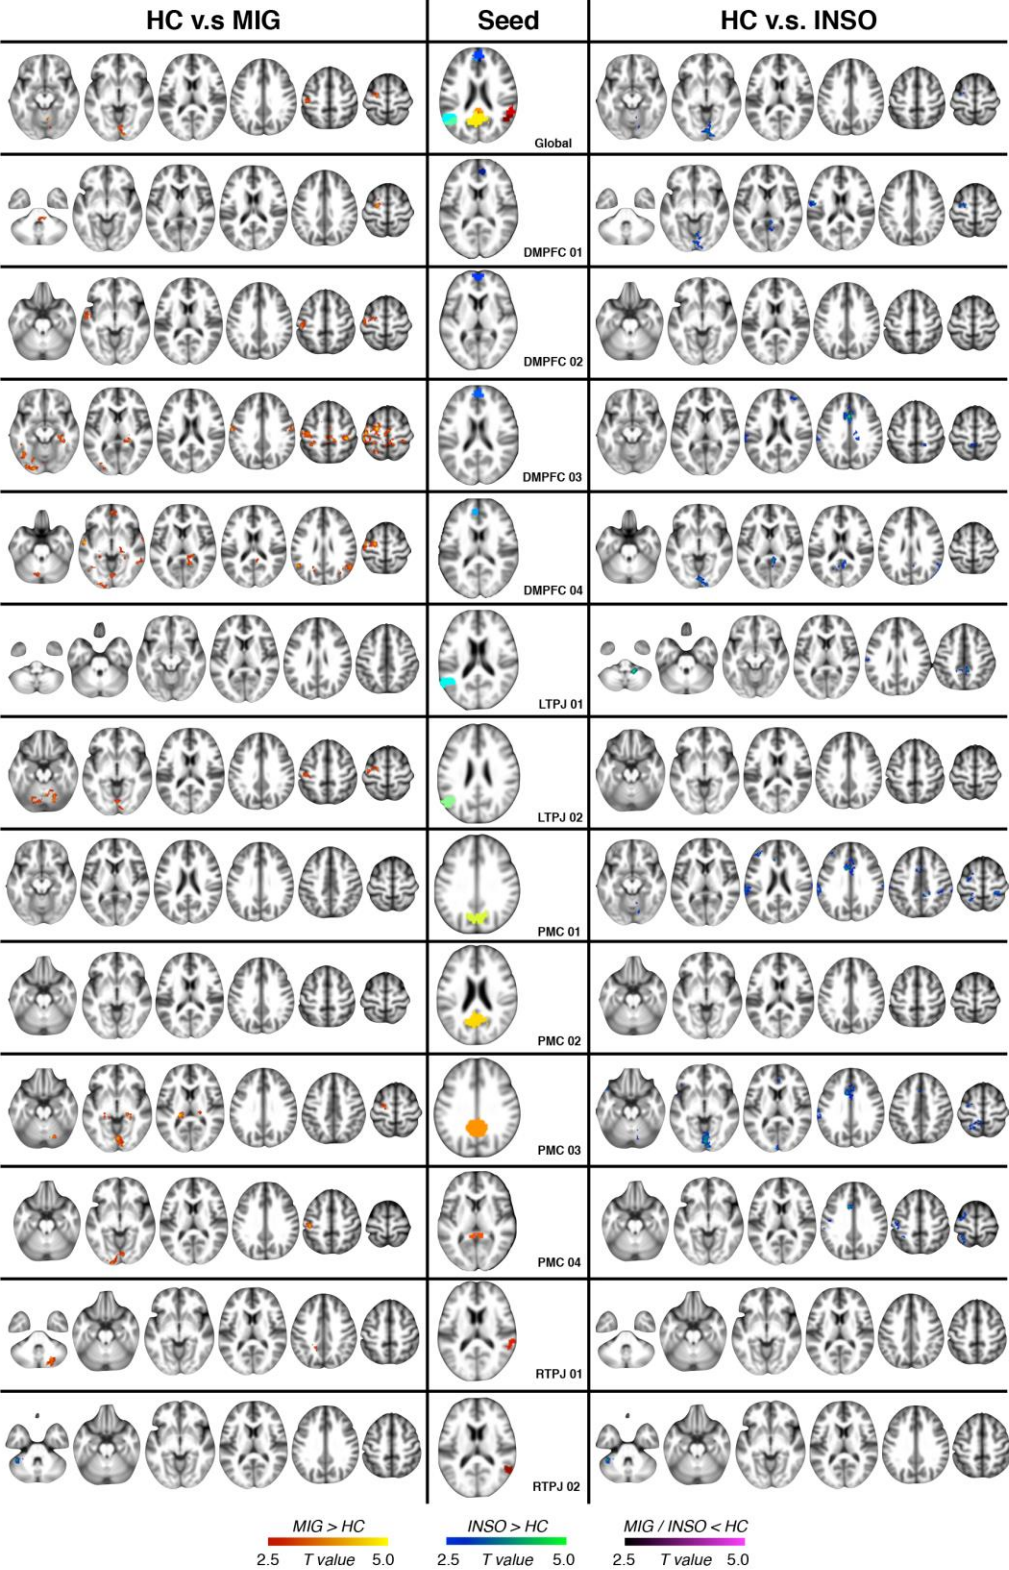

**Supplementary Figure S1.** The detailed FC differences of the global DMN and subnodal DMN between healthy controls and clinical groups (migraine and insomnia). Red-Yellow regions show significantly increased FC in patients with migraine. Blue-Green regions show significantly increased FC in patients with insomnia. Purple regions show significantly increased FC in healthy controls. Abbreviations: DMPFC, dorsomedial prefrontal cortex; FC, functional connectivity; HC, healthy controls; INSO, insomnia; LTPJ, left temporoparietal junctions; MIG, migraine; PMC, posteromedial cortex; RTPJ, right temporoparietal junctions.

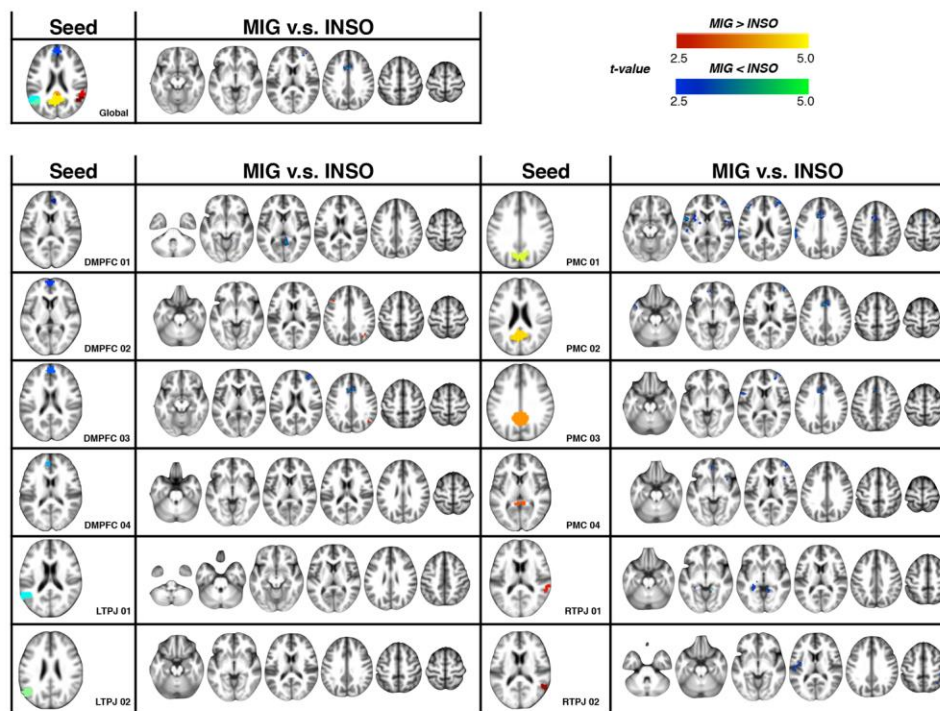

**Supplementary Figure S2.** The detailed FC differences of the global DMN and subnodal DMN between patients with migraine and patients with insomnia. Red-Yellow regions reflect significantly increased FC in patients with migraine. Blue-Green regions show significantly increased FC in patients with insomnia. Abbreviations: DMPFC, dorsomedial prefrontal cortex; FC, functional connectivity; INSO, insomnia; LTPJ, left temporoparietal junctions; MIG, migraine; PMC, posteromedial cortex; RTPJ, right temporoparietal junctions.

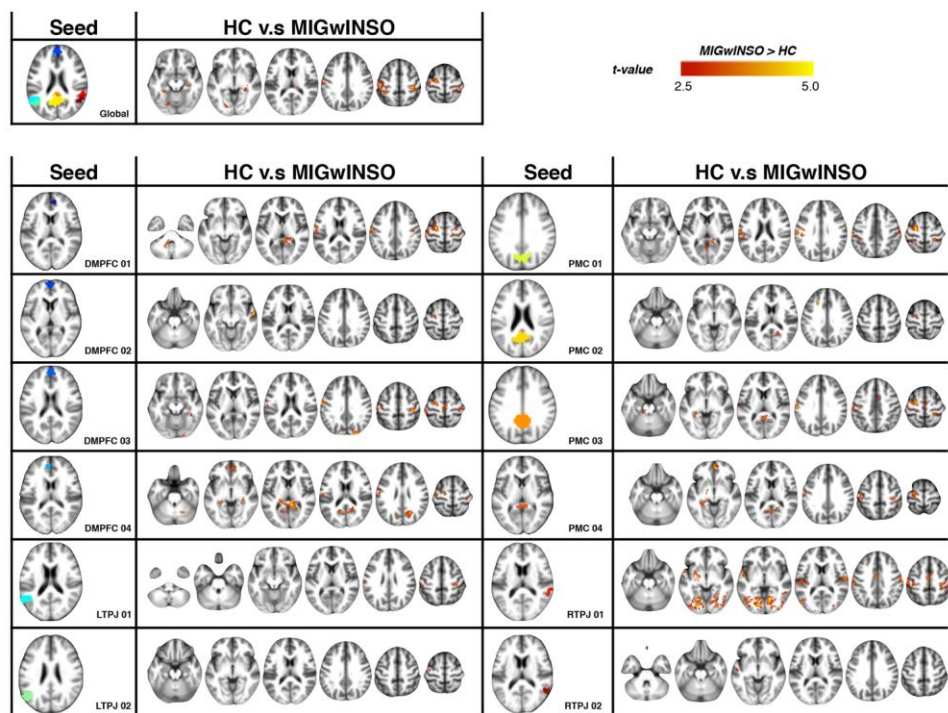

**Supplementary Figure S3.** The detailed FC differences of the global DMN and subnodal DMN between healthy controls and patients with comorbid migraine and insomnia. Hot (red-yellow) regions represent significantly increased FC in patients with comorbid migraine and insomnia. Abbreviations: DMPFC, dorsomedial prefrontal cortex; FC, functional connectivity; HC, healthy controls; LTPJ, left temporoparietal junctions; MIGwINSO, migraine with insomnia; PMC, posteromedial cortex; RTPJ, right temporoparietal junctions.

## Supplementary Tables

**Supplementary Table S1.** Anatomical regions with significant FC changes in migraine patients, insomnia patients compared with healthy controls.

| MNI coordinates      |     |     | Cluster | Maximum T | Anatomical region                      |
|----------------------|-----|-----|---------|-----------|----------------------------------------|
| x                    | y   | z   | size    | value     |                                        |
| <i>Global DMN</i>    |     |     |         |           |                                        |
| <i>HC &lt; MIG</i>   |     |     |         |           |                                        |
| -26                  | -18 | 76  | 182     | 4.80      | Lt. Precentral Gyrus                   |
| 6                    | -62 | -10 | 201     | 4.53      | Rt. Cerebellum V                       |
| -48                  | -21 | 59  | 131     | 3.90      | Lt. Postcentral Gyrus                  |
| <i>HC &lt; INSO</i>  |     |     |         |           |                                        |
| -24                  | -10 | 72  | 136     | 4.13      | Lt. Precentral Gyrus                   |
| 6                    | -64 | -8  | 248     | 3.95      | Rt. Cerebellum V                       |
| <i>MIG &lt; INSO</i> |     |     |         |           |                                        |
| -6                   | 13  | 35  | 170     | 4.45      | Lt. Cingulate Gyrus, anterior division |
| 34                   | 59  | 21  | 120     | 3.58      | Rt. Frontal Pole                       |
| <i>DMPFC 01</i>      |     |     |         |           |                                        |
| <i>HC &lt; MIG</i>   |     |     |         |           |                                        |
| 11                   | -36 | -36 | 123     | 4.55      | Brain stem                             |
| -24                  | -13 | 73  | 169     | 3.77      | Lt. Precentral Gyrus                   |
| <i>HC &lt; INSO</i>  |     |     |         |           |                                        |
| 2                    | -84 | -6  | 303     | 3.98      | Rt. Lingual Gyrus                      |
| 8                    | -43 | 9   | 157     | 3.96      | Rt. Cingulate Gyrus                    |

|                        |     |    |      |      |                                                 |
|------------------------|-----|----|------|------|-------------------------------------------------|
| -60                    | -10 | 16 | 156  | 3.26 | Lt. Postcentral Gyrus                           |
| -30                    | -11 | 68 | 111  | 3.60 | Lt. Precentral Gyrus                            |
| <i>MIG &lt; INSO</i>   |     |    |      |      |                                                 |
| 6                      | -48 | 4  | 197  | 4.79 | Rt. Cingulate Gyrus, posterior division         |
| <b><i>DMPFC 02</i></b> |     |    |      |      |                                                 |
| <i>HC &lt; MIG</i>     |     |    |      |      |                                                 |
| -25                    | -14 | 74 | 155  | 4.35 | Lt. Precentral Gyrus                            |
| -56                    | -1  | -6 | 111  | 4.13 | Lt. Superior Temporal Gyrus, anterior division  |
| -49                    | -23 | 53 | 155  | 3.76 | Lt. Postcentral Gyrus                           |
| <i>MIG &gt; INSO</i>   |     |    |      |      |                                                 |
| -36                    | 22  | 32 | 114  | 4.37 | Lt. Middle Frontal Gyrus                        |
| 40                     | -61 | 47 | 168  | 4.29 | Rt. Lateral Occipital Cortex, superior division |
| <b><i>DMPFC 03</i></b> |     |    |      |      |                                                 |
| <i>HC &lt; MIG</i>     |     |    |      |      |                                                 |
| 4                      | -28 | 56 | 727  | 3.57 | Rt. Precentral Gyrus                            |
| -22                    | -12 | 64 | 1667 | 5.03 | Lt. Precentral Gyrus                            |
| -36                    | -68 | -2 | 757  | 4.90 | Lt. Lateral Occipital Cortex, inferior division |
| 27                     | -39 | -4 | 331  | 4.03 | Rt. Lingual Gyrus                               |
| 8                      | -82 | -6 | 224  | 3.70 | Rt. Lingual Gyrus                               |
| <i>HC &lt; INSO</i>    |     |    |      |      |                                                 |

|                        |     |     |     |      |                                                 |
|------------------------|-----|-----|-----|------|-------------------------------------------------|
| -2                     | 12  | 36  | 346 | 4.95 | Lt. Cingulate Gyrus, anterior division          |
| 16                     | -30 | 42  | 213 | 4.21 | Rt. Precentral Gyrus                            |
| -4                     | -32 | 68  | 136 | 3.37 | Lt. Precentral Gyrus                            |
| -66                    | -34 | 25  | 146 | 3.68 | Lt. Supramarginal Gyrus, anterior division      |
| 31                     | 49  | 20  | 145 | 3.59 | Rt. Frontal Pole                                |
| <i>MIG &gt; INSO</i>   |     |     |     |      |                                                 |
| 42                     | -62 | 41  | 147 | 3.42 | Rt. Lateral Occipital Cortex, superior division |
| <i>MIG &lt; INSO</i>   |     |     |     |      |                                                 |
| 4                      | 20  | 38  | 236 | 4.72 | Rt. Paracingulate Gyrus                         |
| 30                     | 46  | 16  | 148 | 4.02 | Rt. Frontal Pole                                |
| <b><i>DMPFC 04</i></b> |     |     |     |      |                                                 |
| <i>HC &lt; MIG</i>     |     |     |     |      |                                                 |
| 12                     | -37 | 7   | 570 | 4.27 | Rt. Cingulate Gyrus, posterior division         |
| -56                    | -8  | -4  | 206 | 4.82 | Lt. Superior Temporal Gyrus, anterior division  |
| -25                    | -15 | 74  | 381 | 4.81 | Lt. Precentral Gyrus                            |
| -6                     | -70 | -42 | 680 | 4.39 | Lt. Cerebellum VIIb                             |
| -44                    | -66 | -12 | 125 | 4.35 | Lt. Lateral Occipital Cortex, inferior division |
| -48                    | -54 | 30  | 115 | 4.29 | Lt. Angular Gyrus                               |
| -28                    | -30 | -12 | 246 | 3.48 | Lt. Hippocampus                                 |

|                     |     |     |     |      |                                                 |
|---------------------|-----|-----|-----|------|-------------------------------------------------|
| 55                  | -5  | -9  | 307 | 4.10 | Rt. Superior Temporal Gyrus, anterior division  |
| 5                   | 49  | -9  | 125 | 4.06 | Rt. Frontal Medial Cortex                       |
| 54                  | -59 | 32  | 379 | 3.89 | Rt. Lateral Occipital Cortex, superior division |
| -20                 | -62 | 50  | 161 | 3.85 | Lt. Lateral Occipital Cortex, superior division |
| 60                  | -36 | -9  | 228 | 3.74 | Rt. Middle Temporal Gyrus, posterior division   |
| <i>HC &lt; INSO</i> |     |     |     |      |                                                 |
| 18                  | -93 | -1  | 213 | 4.45 | Rt. Occipital Pole                              |
| 8                   | -46 | 18  | 248 | 4.37 | Rt. Cingulate Gyrus, posterior division         |
| 57                  | -60 | 37  | 156 | 3.59 | Rt. Lateral Occipital Cortex, superior division |
| <i>PMC 01</i>       |     |     |     |      |                                                 |
| <i>HC &lt; INSO</i> |     |     |     |      |                                                 |
| 4                   | -64 | -10 | 122 | 5.22 | Rt. Cerebellum V                                |
| -60                 | -30 | 36  | 439 | 4.55 | Lt. Supramarginal Gyrus, anterior division      |
| -10                 | 14  | 34  | 464 | 4.52 | Lt. Cingulate Gyrus, anterior division          |
| -39                 | 39  | 23  | 144 | 4.37 | Lt. Frontal Pole                                |
| -26                 | -50 | 68  | 178 | 4.29 | Lt. Superior Parietal Lobule                    |

|                      |     |     |     |      |                                            |
|----------------------|-----|-----|-----|------|--------------------------------------------|
| 66                   | -22 | 33  | 193 | 4.19 | Rt. Supramarginal Gyrus, anterior division |
| -13                  | 5   | 58  | 157 | 4.12 | Lt. Superior Frontal Gyrus                 |
| 44                   | -34 | 42  | 266 | 3.91 | Rt. Supramarginal Gyrus, anterior division |
| 18                   | -36 | 44  | 120 | 3.87 | Rt. Precentral Gyrus                       |
| <i>MIG &lt; INSO</i> |     |     |     |      |                                            |
| -7                   | 14  | 34  | 619 | 4.95 | Lt. Cingulate Gyrus, anterior division     |
| -38                  | 40  | 29  | 217 | 4.84 | Lt. Frontal Pole                           |
| -54                  | 8   | 6   | 257 | 4.57 | Lt. Precentral Gyrus                       |
| -68                  | -26 | 20  | 489 | 4.13 | Lt. Supramarginal Gyrus, anterior division |
| -30                  | 8   | 10  | 207 | 4.00 | Lt. Insular Cortex                         |
| 37                   | 51  | 20  | 294 | 3.91 | Rt. Frontal Pole                           |
| 50                   | -12 | 12  | 137 | 3.76 | Rt. Central Opercular Cortex               |
| 54                   | -60 | -10 | 112 | 3.71 | Rt. Inferior Temporal Gyrus                |
| <i>PMC 02</i>        |     |     |     |      |                                            |
| <i>MIG &lt; INSO</i> |     |     |     |      |                                            |
| -5                   | 16  | 33  | 204 | 4.65 | Lt. Cingulate Gyrus, anterior division     |
| -50                  | 14  | -12 | 133 | 3.90 | Lt. Temporal Pole                          |
| -5                   | 44  | -8  | 147 | 3.78 | Lt. Paracingulate Gyrus                    |
| 38                   | 52  | 18  | 150 | 3.63 | Rt. Frontal Pole                           |
| <i>PMC 03</i>        |     |     |     |      |                                            |



---

*HC < MIG*

|     |     |     |     |      |                      |
|-----|-----|-----|-----|------|----------------------|
| -18 | -29 | 9   | 296 | 4.94 | Lt. Thalamus         |
| 6   | -62 | -11 | 556 | 4.60 | Rt. Cerebellum V     |
| 22  | -22 | 6   | 257 | 4.50 | Rt. Thalamus         |
| -31 | -11 | 72  | 129 | 4.39 | Lt. Precentral Gyrus |

*HC < INSO*

|     |     |     |     |      |                                               |
|-----|-----|-----|-----|------|-----------------------------------------------|
| 4   | -64 | -10 | 761 | 4.92 | Rt. Cerebellum V                              |
| -10 | 14  | 34  | 483 | 4.37 | Lt. Cingulate Gyrus, anterior division        |
| -48 | 22  | -26 | 180 | 4.19 | Lt. Temporal Pole                             |
| -63 | -33 | 38  | 279 | 4.08 | Lt. Supramarginal Gyrus, anterior<br>division |
| -26 | -10 | 74  | 119 | 4.08 | Lt. Precentral Gyrus                          |
| 4   | 12  | 70  | 159 | 3.44 | Rt. Superior Frontal Gyrus                    |
| -16 | -46 | 67  | 272 | 3.82 | Lt. Postcentral Gyrus                         |

*MIG < INSO*

|     |    |    |     |      |                                                 |
|-----|----|----|-----|------|-------------------------------------------------|
| -4  | 14 | 36 | 309 | 4.97 | Lt. Cingulate Gyrus, anterior division          |
| -58 | 14 | 4  | 132 | 4.44 | Lt. Inferior Frontal Gyrus, pars<br>opercularis |
| 34  | 46 | 22 | 232 | 3.79 | Rt. Frontal Pole                                |

***PMC 04****HC < MIG*

|     |     |    |     |      |                       |
|-----|-----|----|-----|------|-----------------------|
| 8   | -90 | -2 | 148 | 4.22 | Rt. Occipital Pole    |
| -45 | -25 | 54 | 176 | 4.10 | Lt. Postcentral Gyrus |

---

|                       |     |     |     |      |                                               |
|-----------------------|-----|-----|-----|------|-----------------------------------------------|
| -13                   | -97 | -5  | 133 | 3.89 | Lt. Occipital Pole                            |
| <i>HC &lt; INSO</i>   |     |     |     |      |                                               |
| -10                   | 14  | 34  | 124 | 4.21 | Lt. Cingulate Gyrus, anterior division        |
| -32                   | -12 | 66  | 142 | 3.97 | Lt. Precentral Gyrus                          |
| -17                   | -55 | 65  | 203 | 3.88 | Lt. Superior Parietal Lobule                  |
| -48                   | -22 | 42  | 299 | 3.73 | Lt. Postcentral Gyrus                         |
| <i>MIG &lt; INSO</i>  |     |     |     |      |                                               |
| 34                    | 20  | -10 | 163 | 4.59 | Rt. Frontal Orbital Cortex                    |
| 39                    | 53  | 19  | 210 | 3.85 | Rt. Frontal Pole                              |
| -4                    | 46  | -8  | 165 | 3.70 | Lt. Paracingulate Gyrus                       |
| <b><i>LTPJ 01</i></b> |     |     |     |      |                                               |
| <i>HC &lt; INSO</i>   |     |     |     |      |                                               |
| 18                    | -44 | -46 | 126 | 5.39 | Rt. Cerebellum X                              |
| 6                     | -42 | 46  | 194 | 4.45 | Rt. Precuneous Cortex                         |
| -66                   | -24 | 32  | 129 | 4.38 | Lt. Supramarginal Gyrus, anterior<br>division |
| <b><i>LTPJ 02</i></b> |     |     |     |      |                                               |
| <i>HC &lt; MIG</i>    |     |     |     |      |                                               |
| -38                   | -16 | 62  | 251 | 4.14 | Lt. Precentral Gyrus                          |
| 22                    | -70 | -20 | 130 | 4.11 | Rt. Cerebellum VI                             |
| 6                     | -62 | -22 | 111 | 4.11 | Rt. Cerebellum V                              |
| -4                    | -78 | -12 | 249 | 3.75 | Cerebellum Vermis VI                          |
| <b><i>RTPJ 01</i></b> |     |     |     |      |                                               |

---

|                       |     |     |     |      |                              |
|-----------------------|-----|-----|-----|------|------------------------------|
| <i>HC &lt; MIG</i>    |     |     |     |      |                              |
| -20                   | -52 | 30  | 112 | 4.47 | Lt. Precuneous Cortex        |
| 26                    | -68 | -40 | 180 | 4.31 | Rt. Cerebellum Crus II       |
| <i>MIG &lt; INSO</i>  |     |     |     |      |                              |
| 12                    | -48 | -6  | 162 | 4.16 | Rt. Cerebellum V             |
| -27                   | -39 | -4  | 198 | 3.5  | Lt. Hippocampus              |
| <b><i>RTPJ 02</i></b> |     |     |     |      |                              |
| <i>HC &lt; INSO</i>   |     |     |     |      |                              |
| -42                   | -48 | -34 | 117 | 4.08 | Lt. Cerebellum Crus I        |
| <i>MIG &lt; INSO</i>  |     |     |     |      |                              |
| 44                    | -34 | 56  | 189 | 4.16 | Rt. Postcentral Gyrus        |
| -53                   | -19 | 11  | 142 | 3.71 | Lt. Central Opercular Cortex |

---

Peak of group differences in FC magnitude of the global DMN and subnodal DMN with a threshold of FWE-corrected p-value < 0.05.

Abbreviations: DMN, default mode network; DMPFC, dorsomedial prefrontal cortex; FC, functional connectivity; HC, healthy controls; INSO, insomnia; Lt, left; RTPJ, left temporoparietal junctions; MIG, migraine; MNI, Montreal Neurological Institute; PMC, posteromedial cortex; Rt, right; RTPJ, right temporoparietal junctions.

**Supplementary Table S2.** Anatomical regions with significant FC changes in patients with comorbid migraine and insomnia compared with healthy controls.

| MNI coordinates          |     |     | Cluster | Maximum T | Anatomical region                       |
|--------------------------|-----|-----|---------|-----------|-----------------------------------------|
| x                        | y   | z   | size    | value     |                                         |
| <b><i>Global DMN</i></b> |     |     |         |           |                                         |
| <i>HC &lt; MIGwINSO</i>  |     |     |         |           |                                         |
| -22                      | -16 | 76  | 391     | 5.61      | Lt. Precentral gyrus                    |
| 36                       | -28 | 54  | 292     | 5.09      | Rt. Postcentral gyrus                   |
| 10                       | -39 | 7   | 235     | 4.79      | Rt. Cingulate gyrus                     |
| -49                      | -26 | 58  | 911     | 4.67      | Lt. Postcentral gyrus                   |
| -18                      | -36 | 4   | 238     | 4.46      | Lt. Thalamus                            |
| 28                       | -35 | -5  | 144     | 4.38      | Rt. Hippocampus                         |
| -18                      | -66 | -18 | 177     | 3.31      | Lt. Cerebellum VI                       |
| 61                       | -15 | 42  | 130     | 3.99      | Rt. Postcentral gyrus                   |
| <b><i>DMPFC 01</i></b>   |     |     |         |           |                                         |
| <i>HC &lt; MIGwINSO</i>  |     |     |         |           |                                         |
| -22                      | -14 | 76  | 1371    | 5.96      | Lt. Precentral gyrus                    |
| -6                       | -40 | -36 | 123     | 4.95      | Lt. brain stem                          |
| 28                       | -30 | 56  | 222     | 4.29      | Rt. Postcentral Gyrus                   |
| 9                        | -44 | 8   | 143     | 4.27      | Rt. Cingulate Gyrus, posterior division |
| 7                        | -17 | 58  | 248     | 4.13      | Rt. Precentral Gyrus                    |
| 18                       | -24 | 64  | 112     | 4.06      | Rt. Precentral Gyrus                    |
| 44                       | -18 | 40  | 180     | 3.89      | Rt. Postcentral Gyrus                   |

---

**DMPFC 02***HC < MIGwINSO*

|     |     |     |     |      |                                                |
|-----|-----|-----|-----|------|------------------------------------------------|
| 57  | -4  | -12 | 124 | 4.95 | Rt. Superior Temporal Gyrus, anterior division |
| -26 | -20 | 74  | 138 | 4.57 | Lt. Precentral Gyrus                           |

**DMPFC 03***HC < MIGwINSO*

|     |     |     |     |      |                                                 |
|-----|-----|-----|-----|------|-------------------------------------------------|
| 36  | -30 | 54  | 210 | 5.69 | Rt. Postcentral Gyrus                           |
| -64 | -10 | 36  | 486 | 5.29 | Lt. Postcentral Gyrus                           |
| 4   | -14 | 68  | 363 | 4.18 | Rt. Precentral Gyrus                            |
| 24  | -88 | 36  | 495 | 4.89 | Rt. Occipital Pole                              |
| -32 | -10 | 62  | 118 | 4.56 | Lt. Precentral Gyrus                            |
| -20 | -84 | 34  | 114 | 4.21 | Lt. Lateral Occipital Cortex, superior division |
| 32  | -40 | -10 | 111 | 3.54 | Rt. Lingual Gyrus                               |
| 24  | -86 | -7  | 140 | 3.45 | Rt. Occipital Fusiform Gyrus                    |

**DMPFC 04***HC < MIGwINSO*

|    |     |     |      |      |                                                |
|----|-----|-----|------|------|------------------------------------------------|
| 9  | -41 | 7   | 1664 | 4.67 | Rt. Cingulate Gyrus, posterior division        |
| 58 | -4  | -14 | 306  | 5.49 | Rt. Superior Temporal Gyrus, anterior division |
| 19 | -62 | -29 | 253  | 5.09 | Rt. Cerebellum VI                              |

---

|                         |     |     |      |      |                                                 |
|-------------------------|-----|-----|------|------|-------------------------------------------------|
| 38                      | -61 | 39  | 465  | 5.05 | Rt. Lateral Occipital Cortex, superior division |
| -55                     | -18 | 43  | 466  | 4.72 | Lt. Postcentral Gyrus                           |
| -14                     | -51 | -39 | 160  | 4.29 | Lt. Cerebellum IX                               |
| -27                     | -17 | 75  | 141  | 4.32 | Lt. Precentral Gyrus                            |
| 27                      | -38 | -3  | 258  | 4.06 | Rt. Hippocampus                                 |
| 39                      | -26 | 54  | 145  | 4.13 | Rt. Postcentral Gyrus                           |
| -6                      | 45  | -8  | 254  | 3.87 | Lt. Paracingulate Gyrus                         |
| <b><i>PMC 01</i></b>    |     |     |      |      |                                                 |
| <i>HC &lt; MIGwINSO</i> |     |     |      |      |                                                 |
| -22                     | -9  | 64  | 345  | 4.93 | Lt. Precentral Gyrus                            |
| -60                     | -30 | 38  | 1016 | 4.89 | Lt. Supramarginal Gyrus, anterior division      |
| 64                      | -18 | 40  | 377  | 4.37 | Rt. Postcentral Gyrus                           |
| 15                      | -39 | 4   | 167  | 4.00 | Rt. Cingulate Gyrus, posterior division         |
| 24                      | -38 | 64  | 130  | 3.93 | Rt. Postcentral Gyrus                           |
| <b><i>PMC 02</i></b>    |     |     |      |      |                                                 |
| <i>HC &lt; MIGwINSO</i> |     |     |      |      |                                                 |
| 14                      | -62 | 22  | 260  | 4.90 | Rt. Precuneous Cortex                           |
| -26                     | 24  | 36  | 123  | 4.79 | Lt. Middle Frontal Gyrus                        |
| -21                     | -14 | 62  | 134  | 4.05 | Lt. Precentral Gyrus                            |
| <b><i>PMC 03</i></b>    |     |     |      |      |                                                 |
| <i>HC &lt; MIGwINSO</i> |     |     |      |      |                                                 |

|                         |     |     |     |      |                                                     |
|-------------------------|-----|-----|-----|------|-----------------------------------------------------|
| 14                      | -46 | 6   | 411 | 4.90 | Rt. Cingulate Gyrus, posterior division             |
| -25                     | -14 | 74  | 340 | 4.88 | Lt. Precentral Gyrus                                |
| -19                     | -37 | -29 | 146 | 4.87 | Lt. Cerebellum I-IV                                 |
| -64                     | -19 | 33  | 324 | 4.79 | Lt. Postcentral Gyrus                               |
| -52                     | -22 | 60  | 300 | 4.31 | Lt. Postcentral Gyrus                               |
| -37                     | -36 | -19 | 207 | 4.26 | Lt. Temporal Fusiform Cortex,<br>posterior division |
| 15                      | -37 | 69  | 163 | 4.01 | Rt. Postcentral Gyrus                               |
| -4                      | -22 | 62  | 180 | 3.82 | Lt. Precentral Gyrus                                |
| 44                      | -34 | 54  | 124 | 3.81 | Rt. Postcentral Gyrus                               |
| <b><i>PMC 04</i></b>    |     |     |     |      |                                                     |
| <i>HC &lt; MIGwINSO</i> |     |     |     |      |                                                     |
| -11                     | -54 | 20  | 565 | 5.00 | Lt. Precuneous Cortex                               |
| -57                     | -22 | 44  | 484 | 4.83 | Lt. Postcentral Gyrus                               |
| -23                     | -15 | 75  | 230 | 4.63 | Lt. Precentral Gyrus                                |
| 4                       | 50  | -6  | 213 | 4.57 | Rt. Paracingulate Gyrus                             |
| -28                     | 22  | 46  | 145 | 4.56 | Lt. Middle Frontal Gyrus                            |
| -4                      | -60 | -48 | 177 | 4.51 | Lt. Cerebellum IX                                   |
| -28                     | -36 | -6  | 248 | 4.12 | Lt. Hippocampus                                     |
| 34                      | -26 | 52  | 123 | 4.01 | Rt. Postcentral Gyrus                               |
| <b><i>LTPJ 01</i></b>   |     |     |     |      |                                                     |
| <i>HC &lt; MIGwINSO</i> |     |     |     |      |                                                     |
| -61                     | -22 | 44  | 285 | 4.18 | Lt. Postcentral Gyrus                               |

|                         |     |     |      |      |                                                     |
|-------------------------|-----|-----|------|------|-----------------------------------------------------|
| 32                      | -29 | 55  | 123  | 3.80 | Rt. Postcentral Gyrus                               |
| <b><i>LTPJ 02</i></b>   |     |     |      |      |                                                     |
| <i>HC &lt; MIGwINSO</i> |     |     |      |      |                                                     |
| -36                     | -10 | 63  | 116  | 4.77 | Lt. Precentral Gyrus                                |
| <b><i>RTPJ 01</i></b>   |     |     |      |      |                                                     |
| <i>HC &lt; MIGwINSO</i> |     |     |      |      |                                                     |
| -52                     | -62 | 4   | 1306 | 6.25 | Lt. Middle Temporal Gyrus,<br>temporooccipital part |
| 14                      | -69 | -2  | 926  | 5.56 | Rt. Lingual Gyrus                                   |
| -60                     | -24 | 46  | 576  | 5.17 | Lt. Postcentral Gyrus                               |
| -4                      | -26 | 56  | 378  | 5.03 | Lt. Precentral Gyrus                                |
| 64                      | -14 | 36  | 1196 | 5.02 | Rt. Postcentral Gyrus                               |
| 30                      | -56 | -60 | 262  | 4.87 | Rt. Cerebellum VIIIa                                |
| -22                     | -82 | 30  | 241  | 4.65 | Lt. Lateral Occipital Cortex, superior<br>division  |
| -55                     | -5  | -3  | 161  | 4.51 | Lt. Superior Temporal Gyrus, anterior<br>division   |
| 22                      | -84 | 31  | 151  | 4.44 | Rt. Lateral Occipital Cortex, superior<br>division  |
| -67                     | -22 | 15  | 293  | 4.20 | Lt. Postcentral Gyrus                               |
| -24                     | -12 | 62  | 212  | 4.14 | Lt. Precentral Gyrus                                |
| 20                      | -46 | 75  | 129  | 4.12 | Rt. Superior Parietal Lobule                        |
| <b><i>RTPJ 02</i></b>   |     |     |      |      |                                                     |



---

*HC < MIGwINSO*

|     |     |     |     |      |                                                  |
|-----|-----|-----|-----|------|--------------------------------------------------|
| -54 | -22 | -10 | 113 | 3.91 | Lt. Middle Temporal Gyrus, posterior<br>division |
|-----|-----|-----|-----|------|--------------------------------------------------|

---

Peak of group differences in FC magnitude of the global DMN and subnodal DMN with a threshold of FWE-corrected p-value < 0.05.

Abbreviations: DMN, default mode network; DMPFC, dorsomedial prefrontal cortex; FC, functional connectivity; HC, healthy controls; Lt, left; LTPJ, left temporoparietal junctions; MIGwINSO, migraine with insomnia; MNI, Montreal Neurological Institute; PMC, posteromedial cortex; Rt, right; RTPJ, right temporoparietal junctions.
